# Supplementary material for: Influence of rain on the abundance of bioaerosols in fine and coarse particles
Source: Copernicus journal article supplement (doi:10.5194/acp-17-2459-2017), 2017-02-16
Supplement: Supplementary file 1 [file acp-17-2459-2017-supplement.pdf]

Supplement of Atmos. Chem. Phys., 17, 2459–2475, 2017  
<http://www.atmos-chem-phys.net/17/2459/2017/>  
doi:10.5194/acp-17-2459-2017-supplement  
© Author(s) 2017. CC Attribution 3.0 License.

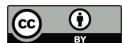

*Supplement of*

## **Influence of rain on the abundance of bioaerosols in fine and coarse particles**

**Chathurika M. Rathnayake et al.**

*Correspondence to:* Elizabeth A. Stone (betsy-stone@uiowa.edu)

The copyright of individual parts of the supplement might differ from the CC-BY 3.0 licence.

**Table S1:** Detection limits and spike recoveries ( $\pm$  one standard deviation) of carbohydrates measured by High Performance Anion Exchange Chromatography with Pulsed Amperometric Detector.

| Compound     | Instrument detection limit (ppb) <sup>1</sup> | Method detection limit (ppb) <sup>2</sup> | Spike recovery (%) (n=12) |
|--------------|-----------------------------------------------|-------------------------------------------|---------------------------|
| Erythritol   | 1.0                                           | 5.9                                       | 99 $\pm$ 6                |
| Levogluconan | 2.0                                           | 5.8                                       | 102 $\pm$ 5               |
| Mannitol     | 0.6                                           | 1.7                                       | 100 $\pm$ 6               |
| Arabinose    | 1.9                                           | 3.3                                       | 103 $\pm$ 5               |
| Glucose      | 0.9                                           | 3.8                                       | 101 $\pm$ 4               |
| Fructose     | 0.6                                           | 2.8                                       | 100 $\pm$ 5               |
| Sucrose      | 0.7                                           | 3.7                                       | 102 $\pm$ 6               |
| Rhamnose     | 0.5                                           | 1.2                                       | 94 $\pm$ 6                |

<sup>1</sup>Instrumental detection limits were determined as three times the standard deviation of seven replicate injections of the lowest calibration point on the standard curve.

<sup>2</sup>Method detection limits were determined as three times the standard deviation of analyte concentrations recovered from seven spiked filter sample.

**Table S2:** Temperature, precipitation, PM concentrations and their size distribution in Iowa City from 17 April – 9 May, from 2010 to 2015.

| Year | Temperature (°C) |       |           | Cumulative precipitation (mm) | PM <sub>2.5</sub> (µg m <sup>-3</sup> ) |       |           | PM <sub>10</sub> (µg m <sup>-3</sup> ) |       |          | Avg. fine fraction (%) | Std. Dev. | Reference  |
|------|------------------|-------|-----------|-------------------------------|-----------------------------------------|-------|-----------|----------------------------------------|-------|----------|------------------------|-----------|------------|
|      | Avg. temp. (°C)  | ±     | Std. Dev. |                               | Avg.                                    | ±     | Std. Dev. | Range                                  | Avg.  | ±        |                        |           |            |
| 2013 |                  |       | NA        |                               | 7.1                                     | ± 3.0 | 1.8 - 13  | 15                                     | ± 8.9 | 2.0 - 32 | 57                     | ± 17      | This study |
| 2010 | 13               | ± 3.4 |           | 93                            | 8.2                                     | ± 6.2 | 3.2 - 25  | 20                                     | ± 12  | 7.0 - 38 | 61                     | ± 22      | EPA AQS*   |
| 2011 | 10               | ± 4.8 |           | 41                            | 5.6                                     | ± 2.3 | 2.5 - 11  | 14                                     | ± 9.0 | 4.0 - 30 | 51                     | ± 30      | EPA AQS*   |
| 2012 | 14               | ± 5.2 |           | 111                           | 8.3                                     | ± 5.1 | 3.4 - 26  | 21                                     | ± 9.3 | 10 - 37  | 55                     | ± 18      | EPA AQS*   |
| 2013 | 12               | ± 6.0 |           | 224                           | 6.3                                     | ± 2.6 | 1.2 - 10  | 19                                     | ± 9.0 | 11 - 35  | 54                     | ± 18      | EPA AQS*   |
| 2014 | 13               | ± 4.2 |           | 93                            | 7.5                                     | ± 4.3 | 1.1 - 15  | 18                                     | ± 7.8 | 7.0 - 30 | 51                     | ± 18      | EPA AQS*   |
| 2015 | 14               | ± 5.1 |           | 124                           | 8.3                                     | ± 4.6 | 2.3 - 18  | 22                                     | ± 12  | 8.0 - 47 | 61                     | ± 10      | EPA AQS*   |

\* PM<sub>2.5</sub> averages were calculated using daily concentrations, and PM<sub>10</sub> averages were calculated using daily concentrations of 1-in-3 day sampling.  
 NA - not applicable

**Table S3:** Temperature, precipitation, PM concentrations and their size distribution in Iowa City from 15 August – 4 September, from 2010 to 2015.

| Year | Avg. temp. (°C) |       |          | Cumulative precipitation (mm) | PM <sub>2.5</sub> (µg m <sup>-3</sup> ) |       |          | PM <sub>10</sub> (µg m <sup>-3</sup> ) |       |         | Avg. fine fraction (%) | Std. Dev | Reference  |
|------|-----------------|-------|----------|-------------------------------|-----------------------------------------|-------|----------|----------------------------------------|-------|---------|------------------------|----------|------------|
|      | Avg.            | ±     | Std. Dev |                               | Avg.                                    | ±     | Std. Dev | Range                                  | Avg.  | ±       |                        |          |            |
| 2013 |                 |       | NA       |                               | 12                                      | ± 3.6 | 3.4 - 17 | 33                                     | ± 8.3 | 21 - 49 | 39                     | ± 12     | This study |
| 2010 | 23              | ± 3.0 |          | 57                            | 9.9                                     | ± 4.2 | 4.3 - 19 | 27                                     | ± 13  | 16 - 52 | 36                     | ± 14     | EPA AQS*   |
| 2011 | 23              | ± 2.9 |          | 51                            | 9.9                                     | ± 4.7 | 4.9 - 27 | 26                                     | ± 4.6 | 21 - 33 | 36                     | ± 7.9    | EPA AQS*   |
| 2012 | 23              | ± 3.0 |          | 36                            | 9.3                                     | ± 3.3 | 4.0 - 17 | 28                                     | ± 9.6 | 15 - 39 | 38                     | ± 9.3    | EPA AQS*   |
| 2013 | 24              | ± 3.8 |          | 1.0                           | 12                                      | ± 2.9 | 7.5 - 17 | 31                                     | ± 5.7 | 25 - 39 | 41                     | ± 7.9    | EPA AQS*   |
| 2014 | 23              | ± 2.2 |          | 115                           | 9.8                                     | ± 4.0 | 4.6 - 18 | 23                                     | ± 11  | 10 - 40 | 41                     | ± 11     | EPA AQS*   |
| 2015 | 21              | ± 3.5 |          | 54                            | 9.4                                     | ± 4.9 | 2.2 - 19 | 24                                     | ± 9.2 | 8 - 36  | 40                     | ± 16     | EPA AQS*   |

\* PM<sub>2.5</sub> averages were calculated using daily concentrations, and PM<sub>10</sub> averages were calculated using daily concentrations of 1-in-3 day sampling.  
NA - not applicable

**Table S4** : Daily concentrations of PM mass and bioaerosol tracers measured from 17 April –9 May in Iowa City, IA, USA.

| Date in 2013 | PM <sub>2.5</sub>             |                               |                                |                               |                                |                              |                                  | PM <sub>10-2.5</sub>          |                               |                                |                               |                                |                              |                                  |
|--------------|-------------------------------|-------------------------------|--------------------------------|-------------------------------|--------------------------------|------------------------------|----------------------------------|-------------------------------|-------------------------------|--------------------------------|-------------------------------|--------------------------------|------------------------------|----------------------------------|
|              | PM mass (µg m <sup>-3</sup> ) | Glucose (ng m <sup>-3</sup> ) | Fructose (ng m <sup>-3</sup> ) | Sucrose (ng m <sup>-3</sup> ) | Mannitol (ng m <sup>-3</sup> ) | Glucan (ng m <sup>-3</sup> ) | Endotoxins (EU m <sup>-3</sup> ) | PM mass (µg m <sup>-3</sup> ) | Glucose (ng m <sup>-3</sup> ) | Fructose (ng m <sup>-3</sup> ) | Sucrose (ng m <sup>-3</sup> ) | Mannitol (ng m <sup>-3</sup> ) | Glucan (ng m <sup>-3</sup> ) | Endotoxins (EU m <sup>-3</sup> ) |
| Apr 17       | 2.93                          | 1.06                          | 0.70                           | 0.65                          | 1.03                           | <0.7                         | 0.002                            | <0.03                         | 5.53                          | <1.03                          | <1.37                         | 5.92                           | 4.65                         | 0.01                             |
| Apr 18       | 1.82                          | 0.60                          | <0.41                          | <0.25                         | 0.65                           | 1.31                         | <0.002                           | <0.03                         | 8.61                          | 1.31                           | 1.21                          | 6.72                           | 2.48                         | 0.00                             |
| Apr 19       | 2.79                          | <0.16                         | <0.41                          | <0.25                         | 0.42                           | 1.18                         | <0.002                           | 0.97                          | <1.37                         | <1.03                          | 2.62                          | 8.40                           | 2.63                         | 0.02                             |
| Apr 20       | 5.26                          | <0.16                         | <0.41                          | <0.25                         | 0.51                           | <0.7                         | <0.002                           | 5.06                          | 3.09                          | <1.03                          | <1.37                         | 2.12                           | 13.5                         | 0.05                             |
| Apr 21       | 5.92                          | 0.51                          | 0.31                           | <0.25                         | 0.84                           | <0.7                         | <0.002                           | 4.09                          | 6.91                          | 1.47                           | 7.64                          | 4.16                           | 5.51                         | 0.02                             |
| Apr 22       | 8.71                          | 0.66                          | <0.41                          | <0.25                         | 0.99                           | 1.80                         | <0.002                           | 5.47                          | 8.91                          | 1.42                           | 15.4                          | 5.78                           | 59.0                         | 0.04                             |
| Apr 23       | 5.62                          | 0.55                          | 0.39                           | <0.25                         | 1.06                           | 2.66                         | <0.002                           | 2.70                          | 1.54                          | <1.03                          | <1.37                         | 1.45                           | 4.32                         | 0.03                             |
| Apr 24       | 7.27                          | 0.55                          | 0.32                           | <0.25                         | 1.51                           | <0.7                         | <0.002                           | 4.67                          | 2.41                          | <1.03                          | <1.37                         | 2.68                           | 3.57                         | 0.04                             |
| Apr 25       | 6.90                          | <0.16                         | 0.23                           | <0.25                         | 0.53                           | 0.83                         | <0.002                           | 8.58                          | 2.85                          | <1.03                          | 2.65                          | 3.93                           | 6.27                         | 0.03                             |
| Apr 26       | 6.56                          | 1.63                          | 0.23                           | 0.30                          | 2.18                           | 1.00                         | <0.002                           | 9.10                          | 14.4                          | 1.20                           | 5.38                          | 8.48                           | 6.02                         | 0.07                             |
| Apr 27       | 9.77                          | 1.92                          | 0.41                           | <0.25                         | 5.24                           | <0.7                         | <0.002                           | 12.6                          | 7.9                           | <1.03                          | 2.79                          | 13.1                           | 1.12                         | 0.05                             |
| Apr 28       | 13.0                          | 1.45                          | <0.41                          | <0.25                         | 2.36                           | 1.12                         | <0.002                           | 14.2                          | 17.9                          | 1.61                           | 7.21                          | 14.8                           | 6.47                         | 0.06                             |
| Apr 29       | 11.5                          | 3.72                          | <0.41                          | <0.25                         | 3.59                           | 2.66                         | 0.005                            | 16.6                          | 10.2                          | 0.69                           | 19.5                          | 22.8                           | 10.4                         | 0.07                             |
| Apr 30       | 9.08                          | 2.17                          | <0.41                          | 0.39                          | 2.48                           | <0.7                         | 0.017                            | 22.6                          | 17.5                          | 3.00                           | 36.8                          | 22.9                           | 9.27                         | 0.10                             |
| May 1        | 8.79                          | 0.90                          | 0.36                           | 0.72                          | 1.38                           | 7.10                         | 0.020                            | 16.8                          | 9.08                          | 2.34                           | 15.8                          | 8.46                           | 5.97                         | 0.09                             |
| May 2        | 1.77                          | 29.9                          | 21.3                           | 52.6                          | 3.68                           | <0.7                         | <0.002                           | 0.40                          | 5.98                          | 2.03                           | 4.17                          | 3.13                           | 9.30                         | 0.02                             |
| May 3        | 5.07                          | 4.58                          | 2.05                           | 4.03                          | 1.92                           | 1.01                         | <0.002                           | 1.41                          | 11.1                          | <1.03                          | <1.37                         | 10.4                           | 13.3                         | 0.01                             |
| May 4        | 6.65                          | 8.81                          | 3.05                           | 3.88                          | 3.47                           | <0.7                         | 0.007                            | 2.28                          | 11.9                          | 1.27                           | 3.78                          | 41.1                           | 15.3                         | 0.06                             |
| May 5        | 9.10                          | 2.46                          | <0.41                          | <0.25                         | 1.82                           | 1.70                         | 0.003                            | 8.44                          | 40.4                          | 5.14                           | 18.8                          | 76.6                           | 101                          | 0.04                             |
| May 6        | 7.51                          | 2.80                          | <0.41                          | 0.31                          | 2.31                           | 2.01                         | 0.007                            | 8.79                          | 19.1                          | 4.53                           | 22.9                          | 55.6                           | 21.9                         | 0.04                             |
| May 7        | 11.1                          | 2.71                          | 0.34                           | 0.81                          | 3.01                           | 0.90                         | 0.002                            | 13.7                          | 19.0                          | 5.60                           | 15.7                          | 63.8                           | 45.9                         | 0.04                             |
| May 8        | 9.55                          | 1.35                          | <0.41                          | <0.25                         | 1.52                           | <0.7                         | 0.012                            | 10.5                          | 31.5                          | 5.19                           | 12.8                          | 68.0                           | 48.5                         | 0.10                             |
| May 9        | 6.50                          | 8.67                          | 0.47                           | 0.31                          | 3.53                           | 3.01                         | <0.002                           | 1.73                          | 53.9                          | 3.64                           | 6.76                          | 68.8                           | 8.40                         | 0.06                             |

**Table S5** : Daily concentrations of PM mass and bioaerosol tracers measured from 15 August – 4 September in Iowa City, IA, USA.

| Date in 2013   | PM <sub>2.5</sub>             |                               |                                |                               |                                |                              |                                  | PM <sub>10-2.5</sub>          |                               |                                |                               |                                |                              |                                  |
|----------------|-------------------------------|-------------------------------|--------------------------------|-------------------------------|--------------------------------|------------------------------|----------------------------------|-------------------------------|-------------------------------|--------------------------------|-------------------------------|--------------------------------|------------------------------|----------------------------------|
|                | PM mass (µg m <sup>-3</sup> ) | Glucose (ng m <sup>-3</sup> ) | Fructose (ng m <sup>-3</sup> ) | Sucrose (ng m <sup>-3</sup> ) | Mannitol (ng m <sup>-3</sup> ) | Glucan (ng m <sup>-3</sup> ) | Endotoxins (EU m <sup>-3</sup> ) | PM mass (µg m <sup>-3</sup> ) | Glucose (ng m <sup>-3</sup> ) | Fructose (ng m <sup>-3</sup> ) | Sucrose (ng m <sup>-3</sup> ) | Mannitol (ng m <sup>-3</sup> ) | Glucan (ng m <sup>-3</sup> ) | Endotoxins (EU m <sup>-3</sup> ) |
| Aug 15         | 11.9                          | 4.59                          | <0.46                          | <0.28                         | 5.26                           | 2.09                         | 0.002                            | 14.2                          | 17.8                          | <1.03                          | 4.66                          | 32.7                           | 10.3                         | 0.08                             |
| Aug 16         | 10.1                          | 3.41                          | <0.46                          | 0.56                          | 4.30                           | 0.61                         | <0.002                           | 22.9                          | 15.9                          | <1.03                          | 2.99                          | 30.6                           | 9.81                         | 0.06                             |
| Aug 17         | 11.1                          | 4.88                          | <0.46                          | <0.28                         | 10.3                           | 2.47                         | 0.002                            | 13.1                          | 23.2                          | <1.03                          | 9.98                          | 44.3                           | 15.7                         | 0.1                              |
| Aug 18         | 12.5                          | 4.41                          | <0.46                          | 0.57                          | 5.27                           | 2.40                         | 0.002                            | 12.9                          | 18.3                          | 1.68                           | 9.56                          | 45.7                           | 8.83                         | 0.05                             |
| Aug 19         | 16.2                          | 8.74                          | <0.46                          | <0.28                         | 6.58                           | <0.70                        | 0.003                            | 15.1                          | 29.5                          | 4.59                           | 7.96                          | 62.1                           | <2.0                         | <0.004                           |
| Aug 20         | 13.8                          | 2.60                          | <0.46                          | <0.28                         | 1.96                           | 1.73                         | 0.005                            | 19.5                          | 26.3                          | 3.6                            | 29.4                          | 42.3                           | 10.2                         | 0.11                             |
| Aug 21         | 15.9                          | 5.17                          | <0.46                          | 0.53                          | 5.74                           | 2.02                         | 0.005                            | 24.5                          | 27.7                          | 4.6                            | 21.5                          | 62.1                           | 12.0                         | 0.07                             |
| Aug 22         | 12.2                          | 19.1                          | <0.46                          | <0.28                         | 16.4                           | 2.85                         | 0.076                            | 12.9                          | 34.4                          | 2.93                           | 12.6                          | 105                            | 13.7                         | 0.14                             |
| Aug 23         | 11.1                          | 6.11                          | <0.46                          | <0.28                         | 3.98                           | 2.58                         | 0.006                            | 11.2                          | 34.3                          | 3.92                           | 19.1                          | 45.3                           | 10.9                         | 0.06                             |
| Aug 24         | 16.7                          | 5.63                          | <0.46                          | <0.28                         | 3.82                           | 2.53                         | 0.001                            | 13.6                          | 33.5                          | 5.35                           | 19.6                          | 40.4                           | 43.9                         | 0.07                             |
| Aug 25         | 15.0                          | 5.20                          | <0.46                          | <0.28                         | 3.73                           | 1.83                         | 0.007                            | 16.8                          | 29.7                          | 4.99                           | 51.8                          | 57.3                           | 14.9                         | 0.17                             |
| Aug 26         | 16.1                          | 3.51                          | <0.46                          | <0.28                         | 3.75                           | 1.06                         | 0.005                            | 20.6                          | 31.6                          | 4.5                            | 16.9                          | 104                            | 8.12                         | 0.06                             |
| Aug 27         | 11.9                          | 10.2                          | <0.46                          | 1.28                          | 5.86                           | 2.21                         | 0.026                            | 28.9                          | 77.5                          | 6.78                           | 33.1                          | 64.9                           | 6.95                         | 0.16                             |
| Aug 28         | 15.7                          | 3.24                          | <0.46                          | 0.42                          | 2.54                           | 3.65                         | 0.006                            | 27.2                          | 25.7                          | 4.32                           | 16.5                          | 43.2                           | 4.7                          | 0.07                             |
| Aug 29         | 14.3                          | 4.34                          | <0.46                          | <0.28                         | 3.27                           | 4.03                         | <0.002                           | 17.2                          | 19.2                          | 2.5                            | 5.39                          | 35.9                           | 3.27                         | 0.07                             |
| Aug 30         | 10.8                          | 5.99                          | <0.46                          | 0.56                          | 7.15                           | 29.1                         | 0.015                            | 37.1                          | 34.8                          | 2.99                           | 8.22                          | 80.0                           | 5.65                         | 0.32                             |
| Aug 31 - Sep 1 | 15.2                          | 5.47                          | <0.46                          | <0.28                         | 7.73                           | 22.1                         | 0.008                            | 34.1                          | 65.4                          | 6.00                           | 6.02                          | 177                            | 42.2                         | 0.39                             |
| Sep 2          | 3.4                           | 3.58                          | <0.46                          | <0.28                         | 3.35                           | 2.09                         | 0.011                            | 17.9                          | 17.3                          | <1.03                          | 7.60                          | 29.0                           | 6.19                         | <0.004                           |
| Sep 3          | 5.59                          | 2.44                          | <0.46                          | <0.28                         | 3.30                           | 0.61                         | 0.009                            | 19.4                          | 10.8                          | <1.03                          | <1.37                         | 23.1                           | <2.0                         | <0.004                           |
| Sep 4          | 7.58                          | 3.31                          | <0.46                          | <0.28                         | 13.2                           | 2.47                         | 0.005                            | 29.5                          | 13.7                          | <1.03                          | 2.68                          | 45.1                           | 3.69                         | 0.14                             |

**Table S6** : Absolute and percent contributions of pollens and fungal spores to PM<sub>2.5</sub> and PM<sub>10</sub> mass during spring in Iowa City, IA, USA estimated by CMB modeling. Uncertainties in bioaerosol contributions represent standard errors of the estimate.

| Date in 2013 | Start time (local) | End time (local) | PM <sub>2.5</sub> Pollens          |         | PM <sub>2.5</sub> Fungal spores    |      |                | PM <sub>10</sub> Pollens           |               | PM <sub>10</sub> Fungal spores     |     |  |
|--------------|--------------------|------------------|------------------------------------|---------|------------------------------------|------|----------------|------------------------------------|---------------|------------------------------------|-----|--|
|              |                    |                  | Mass ± Error (µg m <sup>-3</sup> ) | (%)     | Mass ± Error (µg m <sup>-3</sup> ) | (%)  | 0.66           | Mass ± Error (µg m <sup>-3</sup> ) | (%)           | Mass ± Error (µg m <sup>-3</sup> ) | (%) |  |
| Apr 17       | 8:04               | 8:10             | 0.016 ± 0.004                      | (0.54)  | 0.019 ± 0.004                      | 0.66 | 0.012 ± 0.005  | (0.42)                             | 0.134 ± 0.029 | 4.57                               |     |  |
| Apr 18       | 8:20               | 7:50             | 0.004 ± 0.004                      | (0.21)  | 0.014 ± 0.003                      | 0.75 | 0.072 ± 0.024  | (3.65)                             | 0.143 ± 0.030 | 7.32                               |     |  |
| Apr 19       | 7:52               | 7:57             | <0.002 ± 0.003                     | (<0.09) | 0.008 ± 0.003                      | 0.28 | 0.001 ± 0.004  | (0.04)                             | 0.171 ± 0.035 | 4.55                               |     |  |
| Apr 20       | 8:00               | 8:18             | <0.002 ± 0.003                     | (<0.05) | 0.010 ± 0.003                      | 0.18 | 0.0002 ± 0.002 | (0.002)                            | 0.050 ± 0.021 | 0.49                               |     |  |
| Apr 21       | 8:34               | 7:41             | 0.004 ± 0.004                      | (0.07)  | 0.016 ± 0.004                      | 0.26 | 0.122 ± 0.027  | (1.22)                             | 0.097 ± 0.026 | 0.97                               |     |  |
| Apr 22       | 7:44               | 7:32             | 0.004 ± 0.004                      | (0.05)  | 0.019 ± 0.004                      | 0.22 | 0.175 ± 0.030  | (1.23)                             | 0.131 ± 0.029 | 0.93                               |     |  |
| Apr 23       | 7:40               | 7:47             | 0.003 ± 0.004                      | (0.05)  | 0.021 ± 0.006                      | 0.38 | 0.0004 ± 0.002 | (0.005)                            | 0.050 ± 0.021 | 0.61                               |     |  |
| Apr 24       | 7:50               | 8:10             | 0.005 ± 0.004                      | (0.07)  | 0.029 ± 0.005                      | 0.40 | 0.0005 ± 0.002 | (0.005)                            | 0.082 ± 0.022 | 0.68                               |     |  |
| Apr 25       | 8:15               | 7:34             | 0.0003 ± 0.004                     | (0.005) | 0.010 ± 0.003                      | 0.14 | 0.022 ± 0.014  | (0.14)                             | 0.085 ± 0.023 | 0.55                               |     |  |
| Apr 26       | 7:36               | 8:18             | 0.016 ± 0.004                      | (0.24)  | 0.043 ± 0.008                      | 0.65 | 0.142 ± 0.028  | (0.91)                             | 0.207 ± 0.038 | 1.32                               |     |  |
| Apr 27       | 8:26               | 9:04             | 0.015 ± 0.004                      | (0.16)  | 0.101 ± 0.018                      | 1.03 | 0.041 ± 0.015  | (0.18)                             | 0.355 ± 0.060 | 1.59                               |     |  |
| Apr 28       | 9:28               | 7:43             | 0.010 ± 0.004                      | (0.07)  | 0.047 ± 0.009                      | 0.36 | 0.162 ± 0.031  | (0.59)                             | 0.333 ± 0.059 | 1.22                               |     |  |
| Apr 29       | 7:46               | 8:20             | 0.013 ± 0.004                      | (0.11)  | 0.070 ± 0.013                      | 0.61 | 0.188 ± 0.022  | (0.67)                             | 0.512 ± 0.086 | 1.82                               |     |  |
| Apr 30       | 8:29               | 7:33             | 0.018 ± 0.004                      | (0.20)  | 0.048 ± 0.009                      | 0.53 | 0.351 ± 0.047  | (1.11)                             | 0.494 ± 0.086 | 1.56                               |     |  |
| May 1        | 7:41               | 8:18             | 0.015 ± 0.004                      | (0.17)  | 0.027 ± 0.005                      | 0.31 | 0.203 ± 0.032  | (0.79)                             | 0.191 ± 0.037 | 0.75                               |     |  |
| May 2        | 8:25               | 7:25             | 0.739 ± 0.081                      | (41.70) | 0.069 ± 0.013                      | 3.92 | 0.832 ± 0.092  | (38.38)                            | 0.129 ± 0.029 | 5.96                               |     |  |
| May 3        | 7:38               | 7:54             | 0.079 ± 0.011                      | (1.56)  | 0.037 ± 0.008                      | 0.72 | 0.080 ± 0.012  | (1.24)                             | 0.238 ± 0.043 | 3.68                               |     |  |
| May 4        | 8:17               | 8:08             | 0.109 ± 0.014                      | (1.64)  | 0.068 ± 0.013                      | 1.02 | 0.212 ± 0.032  | (2.37)                             | 0.865 ± 0.147 | 9.69                               |     |  |
| May 5        | 8:31               | 7:49             | 0.017 ± 0.004                      | (0.18)  | 0.035 ± 0.007                      | 0.38 | 0.348 ± 0.047  | (1.98)                             | 1.521 ± 0.263 | 8.67                               |     |  |
| May 6        | 7:50               | 8:00             | 0.013 ± 0.004                      | (0.17)  | 0.045 ± 0.008                      | 0.59 | 0.328 ± 0.043  | (2.01)                             | 1.123 ± 0.193 | 6.89                               |     |  |
| May 7        | 8:05               | 7:41             | 0.032 ± 0.005                      | (0.28)  | 0.058 ± 0.010                      | 0.52 | 0.303 ± 0.041  | (1.22)                             | 1.296 ± 0.223 | 5.22                               |     |  |
| May 8        | 7:43               | 9:45             | 0.008 ± 0.004                      | (0.09)  | 0.029 ± 0.005                      | 0.30 | 0.274 ± 0.038  | (1.36)                             | 1.348 ± 0.233 | 6.72                               |     |  |
| May 9        | 9:49               | 7:42             | 0.018 ± 0.005                      | (0.27)  | 0.068 ± 0.013                      | 1.04 | 0.210 ± 0.037  | (2.55)                             | 1.403 ± 0.240 | 17.04                              |     |  |

**Table S7** : Absolute and percent contributions of fungal spores to PM<sub>2.5</sub> and PM<sub>10-2.5</sub> mass during late summer in Iowa City, IA, USA estimated using 1.7 pg mannitol spore<sup>-1</sup> (range from 1.2-2.4 pg mannitol spore<sup>-1</sup>) and 33 pg spore<sup>-1</sup> in Bauer et al. (2008). Uncertainties in bioaerosol contributions represent standard errors of the estimate.

| Date in 2013 | Start time (local) | End time (local) | PM <sub>2.5</sub> Fungal spores    |        | PM <sub>10-2.5</sub> Fungal spores |         |
|--------------|--------------------|------------------|------------------------------------|--------|------------------------------------|---------|
|              |                    |                  | Mass ± Error (µg m <sup>-3</sup> ) | (%)    | Mass ± Error (µg m <sup>-3</sup> ) | (%)     |
| 15-Aug       | 8:29               | 8:44             | 0.10 ± 0.02                        | (0.86) | 0.63 ± 0.11                        | (4.47)  |
| 16-Aug       | 9:47               | 9:46             | 0.08 ± 0.01                        | (0.83) | 0.59 ± 0.10                        | (2.59)  |
| 17-Aug       | 10:18              | 9:04             | 0.20 ± 0.03                        | (1.80) | 0.86 ± 0.15                        | (6.56)  |
| 18-Aug       | 9:20               | 8:32             | 0.10 ± 0.02                        | (0.82) | 0.89 ± 0.15                        | (6.88)  |
| 19-Aug       | 8:55               | 8:08             | 0.13 ± 0.02                        | (0.79) | 1.21 ± 0.21                        | (7.98)  |
| 20-Aug       | 8:14               | 7:17             | 0.04 ± 0.01                        | (0.28) | 0.82 ± 0.14                        | (4.21)  |
| 21-Aug       | 7:22               | 7:57             | 0.11 ± 0.02                        | (0.70) | 1.21 ± 0.21                        | (4.92)  |
| 22-Aug       | 8:01               | 7:21             | 0.32 ± 0.05                        | (2.61) | 2.04 ± 0.35                        | (15.80) |
| 23-Aug       | 7:24               | 8:11             | 0.08 ± 0.01                        | (0.70) | 0.88 ± 0.15                        | (7.85)  |
| 24-Aug       | 8:20               | 8:31             | 0.07 ± 0.01                        | (0.45) | 0.78 ± 0.14                        | (5.77)  |
| 25-Aug       | 8:41               | 7:17             | 0.07 ± 0.01                        | (0.48) | 1.11 ± 0.19                        | (6.62)  |
| 26-Aug       | 7:20               | 7:27             | 0.07 ± 0.01                        | (0.45) | 2.02 ± 0.35                        | (9.80)  |
| 27-Aug       | 7:33               | 7:22             | 0.11 ± 0.02                        | (0.96) | 1.26 ± 0.22                        | (4.36)  |
| 28-Aug       | 7:26               | 7:27             | 0.05 ± 0.01                        | (0.31) | 0.84 ± 0.15                        | (3.08)  |
| 29-Aug       | 7:32               | 7:29             | 0.06 ± 0.01                        | (0.44) | 0.70 ± 0.12                        | (4.05)  |
| 30-Aug       | 7:32               | 6:24             | 0.14 ± 0.02                        | (1.29) | 1.55 ± 0.27                        | (4.19)  |
| 31-Aug -     |                    |                  |                                    |        |                                    |         |
| 01-Sep       | 6:28               | 7:46             | 0.15 ± 0.03                        | (0.99) | 3.44 ± 0.60                        | (10.07) |
| 2-Sep        | 7:50               | 7:40             | 0.07 ± 0.01                        | (1.91) | 0.56 ± 0.10                        | (3.14)  |
| 3-Sep        | 7:43               | 7:29             | 0.06 ± 0.01                        | (1.15) | 0.45 ± 0.08                        | (2.31)  |
| 4-Sep        | 7:32               | 7:25             | 0.26 ± 0.04                        | (3.38) | 0.88 ± 0.15                        | (2.97)  |



Figure S1: Microscope images of pollens from (a) red oak, (b) pin oak, (c) corn, (d) cotton ragweed (Polysciences), (e) cotton ragweed (locally collected), and (f) giant ragweed. Images in colour were captured by fluorescence microscope, while black and white images were captured by an inverted microscope

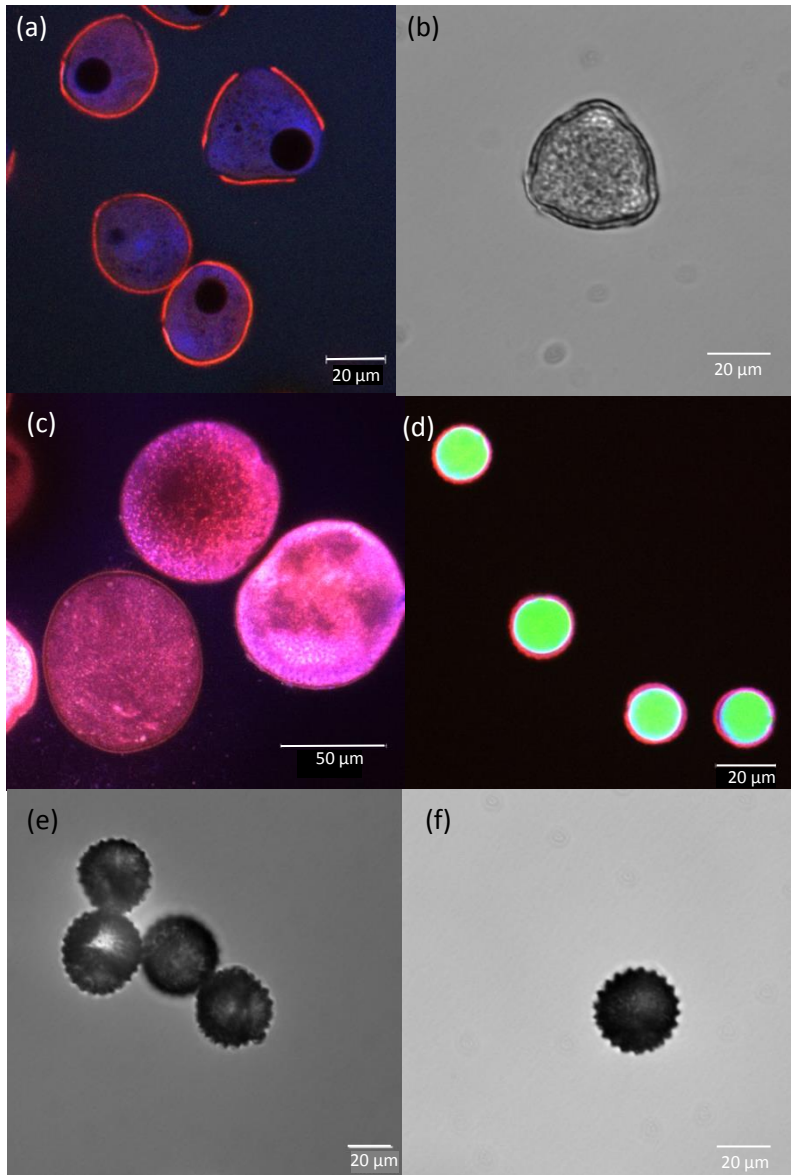

**Figure S2:** Comparison of CMB calculated  $R^2$  values, which represent the fraction of the variance in the ambient measurements explained by the model, for  $PM_{10}$  (a) and  $PM_{2.5}$  (b) for various pollen profiles. The comparison is limited to 26 April – 9 May, after the onset of the pollen season. Results indicated that the oak pollens fit the ambient data better than birch or willow, with the most variance explained by the combination of oak pollens and fungal spores.

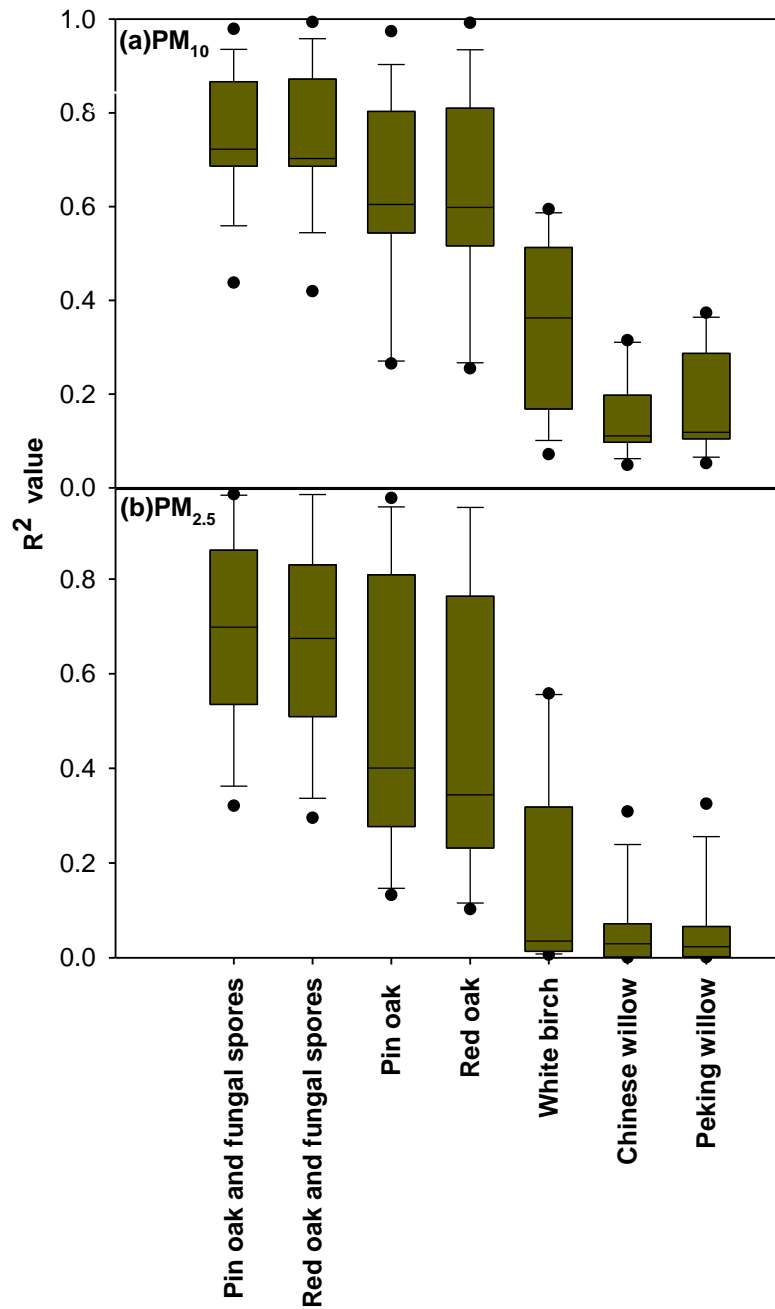

**Figure S3:** Comparison of pollen contributions to PM<sub>10</sub> (a) and PM<sub>2.5</sub> (b) mass, estimated by the CMB model using pin oak and red oak pollen profiles. The comparison is limited to 26 April – 9 May, after the onset of the pollen season. The strong correlation ( $R^2 > 0.99$ ) and numerical agreement (slopes close to 1) demonstrate the consistency in model results for when either profile is used. Consequently, source contributions from these two types were averaged to obtain the best estimate of pollen contributions to PM mass.

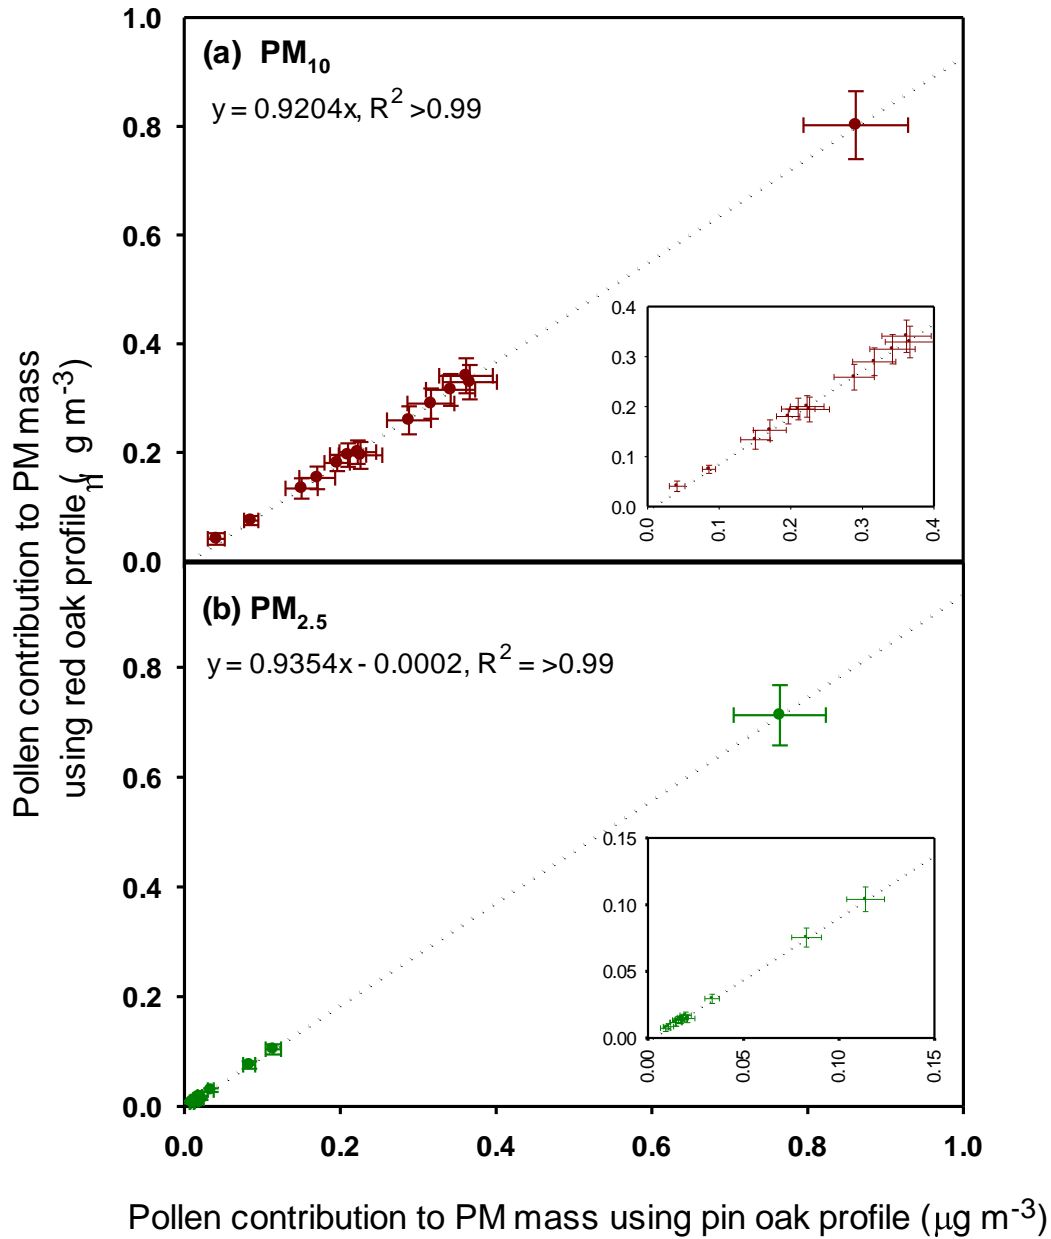

## References

Bauer, H., Claeys, M., Vermeylen, R., Schueller, E., Weinke, G., Berger, A., and Puxbaum, H.: Arabitol and mannitol as tracers for the quantification of airborne fungal spores, *Atmos. Environ.*, 42, 588-593, doi: 10.1016/j.atmosenv.2007.10.013, 2008.
